# Supplementary material
Source: Springer Nature journal article supplement (https://www.springermedizin.de/resource/supplementary/12885_2008_1574_MOESM5_ESM.pdf/9472360)

A

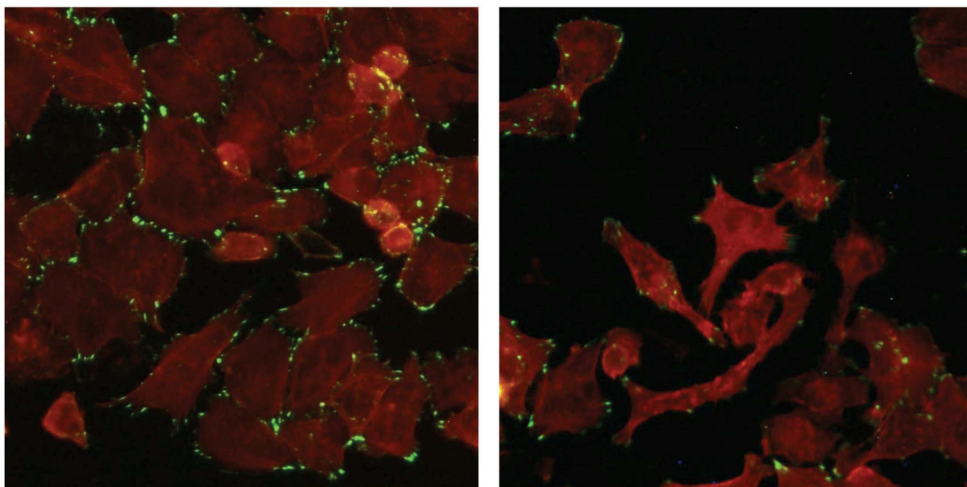

B

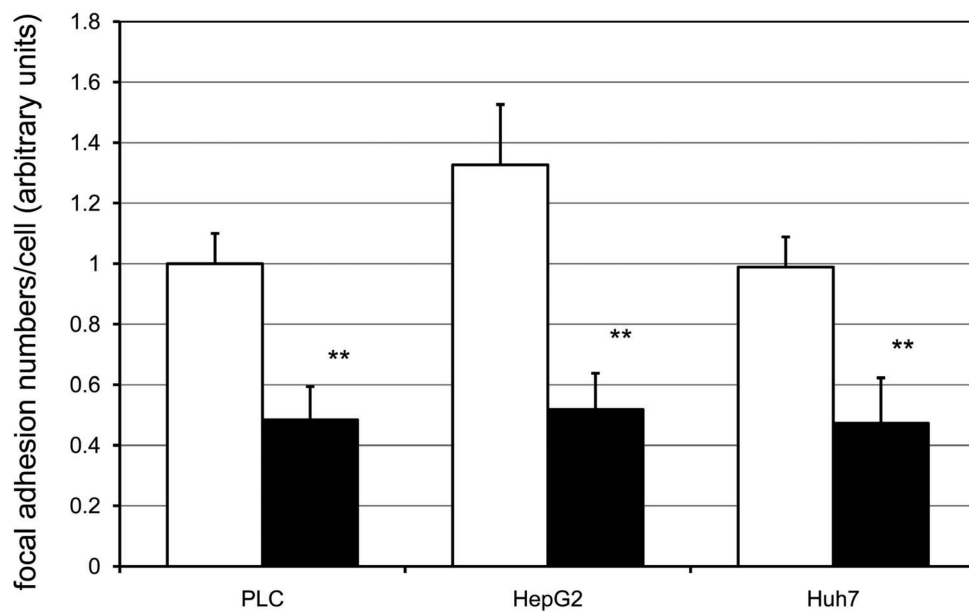

Supplement: MOESM5 [file 9472360]
